# Supplementary material for: Evaluation of a protocol for remote identification of mosquito vector species reveals BG-Sentinel trap as an efficient tool for Anopheles gambiae outdoor collection in Burkina Faso
Source: Springer Nature journal article supplement (doi:10.1186/s12936-015-0674-7), 2015-04-14
Supplement: MOESM4 [file 9761226]

| Year         | Season | Village | Position | Trap | An. gambiae |            | An. coustani |          | An. zeimanni |          | An. pharoensis |          | An. nili |          | An. funestus |          | An. rufipes |          | Cx. decens |          | Cx. quinquefasciatus |          | Cx. nebulosus |          | Cx. Cx. tigripes |          | Cx. cinereus |          | Ae. aegypti |          | Ae. taylori |          | Ae. hirsutus |          | Ma. uniformis |          | Culex sp. |          | Aedes sp. |          | Mansonia sp. |   |   |   |   |
|--------------|--------|---------|----------|------|-------------|------------|--------------|----------|--------------|----------|----------------|----------|----------|----------|--------------|----------|-------------|----------|------------|----------|----------------------|----------|---------------|----------|------------------|----------|--------------|----------|-------------|----------|-------------|----------|--------------|----------|---------------|----------|-----------|----------|-----------|----------|--------------|---|---|---|---|
|              |        |         |          |      | ♀           | ♂          | ♀            | ♂        | ♀            | ♂        | ♀              | ♂        | ♀        | ♂        | ♀            | ♂        | ♀           | ♂        | ♀          | ♂        | ♀                    | ♂        | ♀             | ♂        | ♀                | ♂        | ♀            | ♂        | ♀           | ♂        | ♀           | ♂        | ♀            | ♂        | ♀             | ♂        | ♀         | ♂        | ♀         | ♂        | ♀            | ♂ | ♀ | ♂ |   |
|              |        |         |          |      | 2011        | rainy      | Goden        | IN       | BG           | 77       | 2              | 1        | 0        | 0        | 0            | 0        | 0           | 0        | 0          | 1        | 0                    | 0        | 0             | 0        | 0                | 0        | 0            | 0        | 0           | 0        | 0           | 0        | 0            | 0        | 0             | 0        | 0         | 0        | 0         | 0        | 0            | 0 | 0 | 0 | 0 |
|              |        |         |          | CDC  | 151         | 13         | 0            | 0        | 0            | 0        | 0              | 0        | 0        | 0        | 0            | 0        | 1           | 0        | 0          | 0        | 0                    | 0        | 0             | 0        | 0                | 0        | 1            | 0        | 0           | 0        | 0           | 0        | 0            | 0        | 0             | 0        | 0         | 0        | 0         | 3        | 4            | 0 | 0 |   |   |
|              |        |         | OUT      | BG   | 14          | 0          | 0            | 0        | 0            | 0        | 0              | 0        | 0        | 0        | 0            | 0        | 0           | 0        | 0          | 0        | 0                    | 0        | 0             | 1        | 0                | 0        | 0            | 0        | 0           | 1        | 0           | 0        | 0            | 0        | 0             | 0        | 0         | 0        | 0         | 0        | 1            | 0 | 0 |   |   |
|              |        |         |          | CDC  | 3           | 0          | 3            | 0        | 4            | 1        | 2              | 0        | 1        | 0        | 0            | 0        | 0           | 0        | 0          | 0        | 0                    | 0        | 0             | 1        | 0                | 0        | 0            | 0        | 0           | 0        | 1           | 0        | 0            | 0        | 0             | 0        | 0         | 0        | 0         | 0        | 0            | 0 | 0 |   |   |
| 2012         | rainy  | Goden   | IN       | BG   | 196         | 9          | 0            | 0        | 0            | 0        | 0              | 2        | 0        | 0        | 0            | 0        | 0           | 0        | 0          | 0        | 0                    | 0        | 0             | 0        | 0                | 0        | 0            | 0        | 0           | 0        | 0           | 0        | 0            | 0        | 0             | 0        | 0         | 0        | 0         | 0        | 0            | 0 | 0 |   |   |
|              |        |         |          | CDC  | 271         | 1          | 0            | 0        | 0            | 0        | 0              | 1        | 0        | 0        | 0            | 0        | 0           | 0        | 0          | 0        | 0                    | 0        | 0             | 0        | 0                | 0        | 0            | 0        | 0           | 0        | 0           | 0        | 0            | 0        | 0             | 0        | 0         | 0        | 0         | 0        | 0            | 0 | 0 |   |   |
|              |        |         | OUT      | BG   | 131         | 12         | 0            | 0        | 0            | 0        | 0              | 1        | 0        | 0        | 0            | 0        | 0           | 0        | 0          | 0        | 0                    | 0        | 4             | 0        | 0                | 0        | 0            | 0        | 0           | 0        | 0           | 0        | 0            | 0        | 0             | 0        | 0         | 0        | 0         | 0        | 0            | 0 | 0 |   |   |
|              |        |         |          | CDC  | 13          | 0          | 0            | 0        | 0            | 0        | 0              | 0        | 0        | 1        | 0            | 0        | 0           | 0        | 0          | 0        | 0                    | 0        | 0             | 0        | 0                | 0        | 0            | 0        | 0           | 0        | 0           | 0        | 0            | 0        | 0             | 0        | 0         | 0        | 0         | 0        | 0            | 0 | 0 |   |   |
|              |        |         | IN       | BG   | 58          | 39         | 0            | 0        | 0            | 0        | 0              | 0        | 0        | 0        | 0            | 0        | 4           | 0        | 0          | 0        | 0                    | 0        | 0             | 0        | 0                | 0        | 0            | 0        | 0           | 0        | 0           | 0        | 0            | 0        | 0             | 0        | 0         | 0        | 0         | 1        | 0            | 0 | 0 |   |   |
|              |        |         |          | CDC  | 119         | 34         | 5            | 0        | 0            | 0        | 2              | 1        | 0        | 0        | 0            | 0        | 0           | 0        | 0          | 0        | 0                    | 0        | 0             | 0        | 0                | 0        | 0            | 0        | 0           | 0        | 0           | 0        | 0            | 0        | 0             | 0        | 0         | 0        | 0         | 0        | 0            | 0 | 4 | 0 |   |
|              |        |         | OUT      | BG   | 69          | 39         | 2            | 0        | 0            | 0        | 1              | 0        | 0        | 0        | 0            | 0        | 5           | 0        | 4          | 1        | 0                    | 0        | 0             | 1        | 0                | 0        | 0            | 1        | 0           | 0        | 0           | 1        | 0            | 0        | 0             | 0        | 0         | 0        | 0         | 0        | 0            | 0 | 0 |   |   |
|              |        |         |          | CDC  | 5           | 0          | 24           | 0        | 2            | 0        | 0              | 0        | 0        | 0        | 0            | 0        | 0           | 0        | 0          | 0        | 0                    | 0        | 0             | 2        | 0                | 0        | 0            | 0        | 0           | 0        | 0           | 0        | 0            | 0        | 0             | 0        | 0         | 0        | 0         | 0        | 0            | 0 |   |   |   |
|              | dry    | Goden   | IN       | BG   | 0           | 0          | 0            | 0        | 0            | 0        | 0              | 0        | 0        | 0        | 0            | 0        | 0           | 0        | 0          | 0        | 0                    | 0        | 0             | 0        | 0                | 0        | 0            | 0        | 0           | 0        | 0           | 0        | 0            | 0        | 0             | 0        | 0         | 0        | 0         | 0        | 0            | 0 | 0 |   |   |
|              |        |         |          | CDC  | 9           | 6          | 0            | 0        | 0            | 0        | 0              | 0        | 0        | 0        | 0            | 0        | 2           | 1        | 0          | 0        | 0                    | 0        | 0             | 0        | 0                | 0        | 0            | 0        | 0           | 0        | 0           | 0        | 0            | 0        | 0             | 0        | 0         | 0        | 0         | 0        | 0            | 0 | 0 |   |   |
|              |        |         | OUT      | BG   | 2           | 0          | 0            | 0        | 0            | 0        | 0              | 0        | 0        | 0        | 0            | 0        | 1           | 0        | 0          | 0        | 0                    | 0        | 0             | 0        | 0                | 0        | 0            | 0        | 0           | 0        | 0           | 0        | 0            | 0        | 0             | 0        | 0         | 0        | 0         | 0        | 0            | 0 | 0 |   |   |
|              |        |         |          | CDC  | 1           | 0          | 0            | 0        | 0            | 0        | 0              | 0        | 0        | 0        | 0            | 0        | 2           | 0        | 0          | 0        | 0                    | 0        | 0             | 0        | 0                | 0        | 0            | 0        | 0           | 0        | 0           | 0        | 0            | 0        | 0             | 0        | 0         | 0        | 0         | 0        | 0            | 0 | 0 |   |   |
|              |        |         | IN       | BG   | 8           | 13         | 0            | 0        | 0            | 0        | 0              | 0        | 0        | 0        | 0            | 0        | 4           | 1        | 1          | 0        | 0                    | 0        | 0             | 0        | 0                | 0        | 0            | 0        | 0           | 0        | 0           | 0        | 0            | 0        | 0             | 0        | 0         | 0        | 0         | 0        | 0            | 0 | 0 |   |   |
|              |        |         |          | CDC  | 12          | 8          | 4            | 1        | 0            | 0        | 0              | 0        | 0        | 0        | 0            | 0        | 12          | 4        | 5          | 0        | 0                    | 0        | 0             | 0        | 0                | 0        | 0            | 0        | 0           | 0        | 0           | 0        | 0            | 0        | 2             | 0        | 0         | 0        | 0         | 0        | 0            | 0 |   |   |   |
|              |        |         | OUT      | BG   | 20          | 1          | 1            | 0        | 0            | 0        | 0              | 0        | 0        | 0        | 0            | 0        | 10          | 1        | 9          | 2        | 0                    | 0        | 0             | 0        | 0                | 0        | 0            | 0        | 0           | 0        | 0           | 0        | 0            | 0        | 0             | 0        | 0         | 0        | 0         | 0        | 0            | 0 |   |   |   |
|              |        |         |          | CDC  | 2           | 8          | 1            | 0        | 0            | 0        | 0              | 0        | 0        | 0        | 0            | 0        | 9           | 2        | 2          | 0        | 0                    | 0        | 0             | 0        | 0                | 0        | 0            | 0        | 0           | 0        | 0           | 0        | 0            | 0        | 0             | 0        | 0         | 0        | 0         | 0        | 0            | 0 |   |   |   |
| <b>Total</b> |        |         |          |      | <b>1161</b> | <b>185</b> | <b>41</b>    | <b>1</b> | <b>6</b>     | <b>1</b> | <b>5</b>       | <b>1</b> | <b>5</b> | <b>0</b> | <b>2</b>     | <b>0</b> | <b>1</b>    | <b>0</b> | <b>49</b>  | <b>9</b> | <b>21</b>            | <b>3</b> | <b>6</b>      | <b>0</b> | <b>3</b>         | <b>0</b> | <b>1</b>     | <b>0</b> | <b>2</b>    | <b>0</b> | <b>1</b>    | <b>0</b> | <b>1</b>     | <b>0</b> | <b>2</b>      | <b>0</b> | <b>4</b>  | <b>4</b> | <b>4</b>  | <b>4</b> | <b>4</b>     |   |   |   |   |
